# Supplementary material for: Sulfur-doped porous carbon nanosheets as an advanced electrode material for supercapacitors
Source: Royal Society of Chemistry journal article supplement (doi:10.1039/c4ra14820g), 2015-01-01
Supplement: c4ra14820g1.pdf [file c4ra14820g1.pdf]

## Supporting Information

# **Sulfur-doped porous carbon nanosheets as an advanced electrode material for supercapacitor**

Wenfang Deng, Yijia Zhang, Lu Yang, Yueming Tan\*, Ming Ma, and Qingji Xie

Key Laboratory of Chemical Biology and Traditional Chinese Medicine Research (Ministry of Education of China), College of Chemistry and Chemical Engineering, Hunan Normal University, Changsha 410081, China

\* Corresponding author. Tel./fax: +86 731 8865515

E-mail address: tanyueming0813@126.com

**Table S1.** The percentage of given elements in different samples obtained from XPS data.

| Sample | Atomic percentage (at%) |      |      |      | Weight percentage (wt%) |      |      |
|--------|-------------------------|------|------|------|-------------------------|------|------|
|        | C                       | O    | S    | C/O  | C                       | O    | S    |
| S-PCNS | 92.09                   | 4.02 | 3.89 | 22.9 | 85.41                   | 4.97 | 9.62 |
| S-AC   | 89.08                   | 7.45 | 3.47 | 12.0 | 82.28                   | 9.17 | 8.55 |

**Table S2.** Textural properties of S-PCNS and S-AC.

|        | BET<br>surface<br>area (m <sup>2</sup><br>g <sup>-1</sup> ) | Micropore<br>area (m <sup>2</sup> g <sup>-1</sup> ) | External<br>surface area<br>(m <sup>2</sup> g <sup>-1</sup> ) | Total pore<br>volume (cm <sup>3</sup><br>g <sup>-1</sup> ) | Micropore<br>volume (cm <sup>3</sup><br>g <sup>-1</sup> ) | Average<br>pore<br>diameter<br>(nm) |
|--------|-------------------------------------------------------------|-----------------------------------------------------|---------------------------------------------------------------|------------------------------------------------------------|-----------------------------------------------------------|-------------------------------------|
| S-PCNS | 2005                                                        | 585                                                 | 1420                                                          | 1.21                                                       | 0.33                                                      | 2.5                                 |
| S-AC   | 2172                                                        | 663                                                 | 1509                                                          | 1.34                                                       | 0.38                                                      | 2.7                                 |

**Table S3.** Comparison of specific capacitances of some sulfur-doped carbons and graphene materials in the literature.

| Material                                                                     | electrolyte                        | $C_s$ (F g <sup>-1</sup> ) | Ref.      |
|------------------------------------------------------------------------------|------------------------------------|----------------------------|-----------|
| S-PCNS                                                                       | 6 M KOH                            | 312                        | This work |
| N, S-doped activated hydrothermal carbon derived from human hair and glucose | 6 M KOH                            | 264                        | S1        |
| Sulfur-containing activated carbons                                          | LiCl                               | ~200                       | S2        |
| S-doped micro/mesoporous carbon-graphene composite                           | 6 M KOH                            | 109                        | S3        |
| Nitrogen and sulfur co-doped ordered mesoporous carbon                       | 2 M KOH                            | ≤ 200                      | S4        |
| S-doped carbon/graphene composite                                            | 1 M H <sub>2</sub> SO <sub>4</sub> | 178                        | S5        |
| Aromatic sulfur mediated mesoporous carbon                                   | 6 M KOH                            | 191                        | S6        |
| Graphene-based macro- and mesoporous frameworks                              | 1 M H <sub>2</sub> SO <sub>4</sub> | 226                        | S7        |
| Graphene-CNT networks                                                        | 6 M KOH                            | 180                        | S8        |
| Few layer graphene and carbon nanotube foam architectures                    | 6 M KOH                            | 286                        | S9        |
| Hybrid graphene/CNTs                                                         | 30 wt % KOH                        | 187                        | S10       |
| Three-dimensional graphene hydrogel                                          | 1 M H <sub>2</sub> SO <sub>4</sub> | ~190                       | S11       |
| Three-dimensional graphene gel                                               | 5 M KOH                            | 152                        | S12       |
| Mesoporous graphene nanoballs                                                | 1 M H <sub>2</sub> SO <sub>4</sub> | 206                        | S13       |
| Three-dimensional hierarchical porous graphene-like networks                 | 6 M KOH                            | 305                        | S14       |

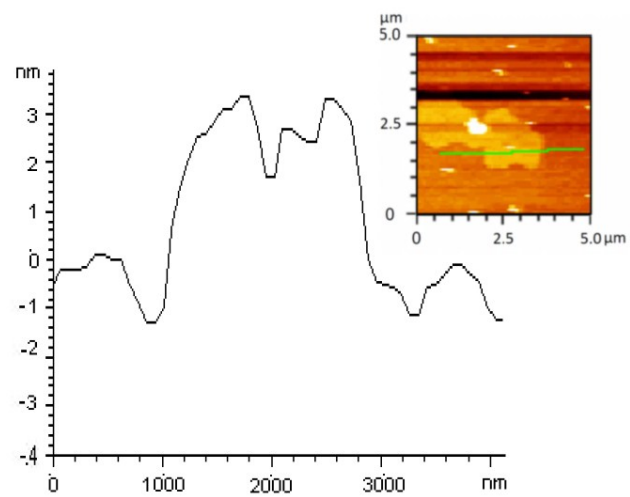

**Fig. S1** AFM image of S-PCNS.

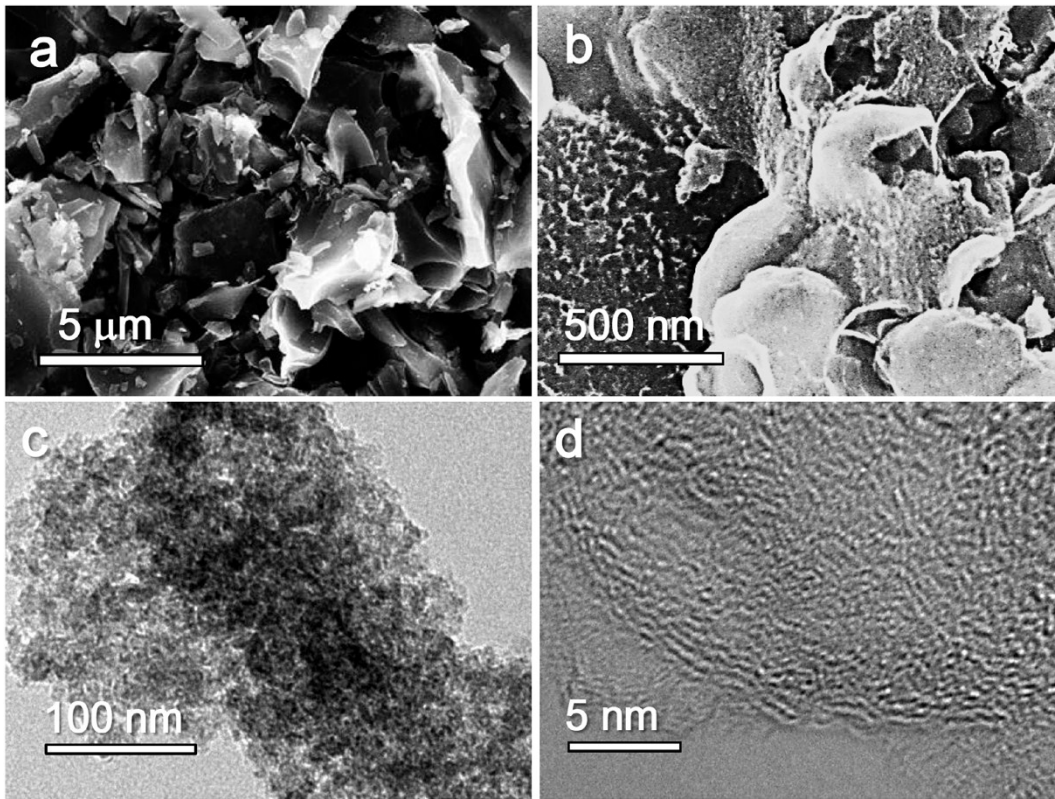

**Fig. S2** SEM (a, b) and TEM (c, d) images of S-AC.

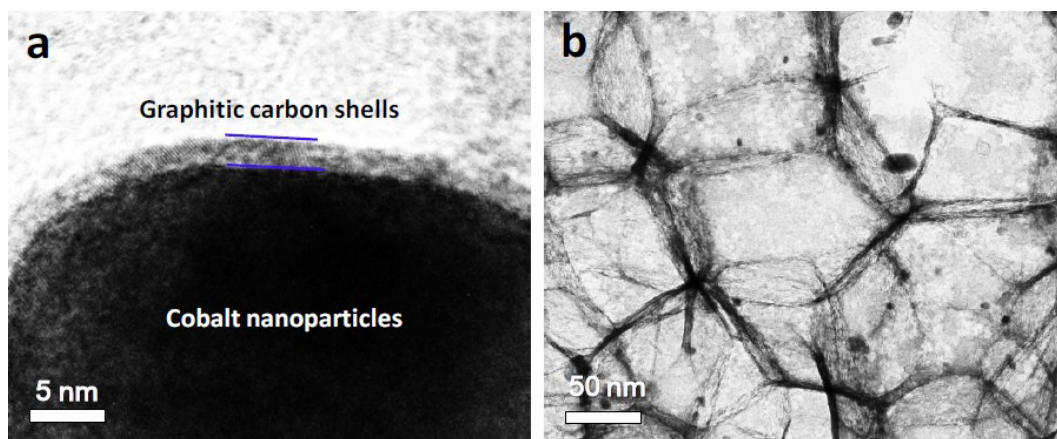

**Fig. S3** (a) TEM image of cobalt ion-impregnated sulfonic acid ion exchange resin after pyrolysis. (b) TEM image of cobalt ion-impregnated sulfonic acid ion exchange resin after pyrolysis followed by acid leaching.

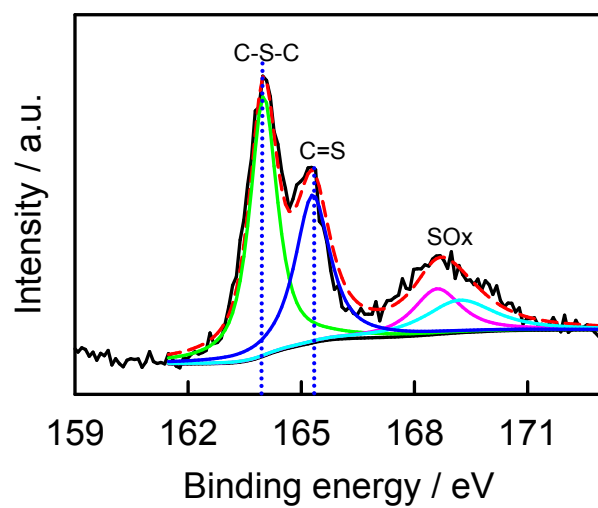

**Fig. S4** High resolution XPS spectrum of S2p peak for S-AC.



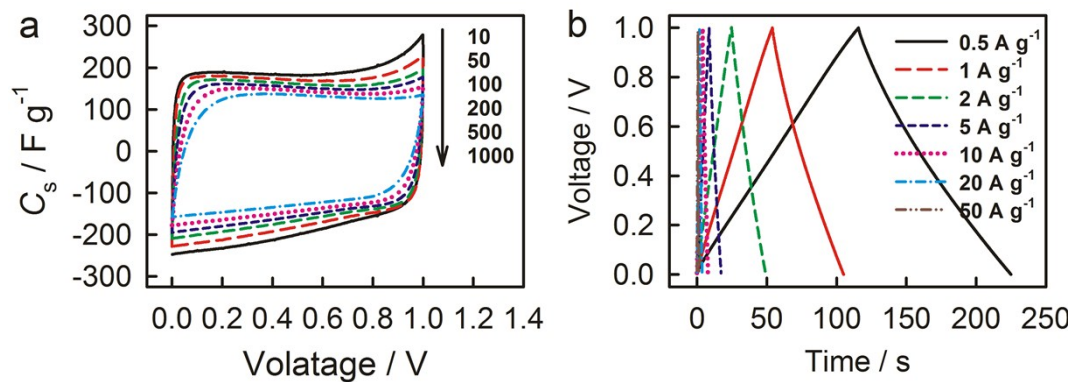

**Fig. S5** (a) Cyclic voltammograms of S-AC in 6 M KOH aqueous solution at different scan rates. (b) Galvanostatic charge-discharge curves of S-AC at different current densities.

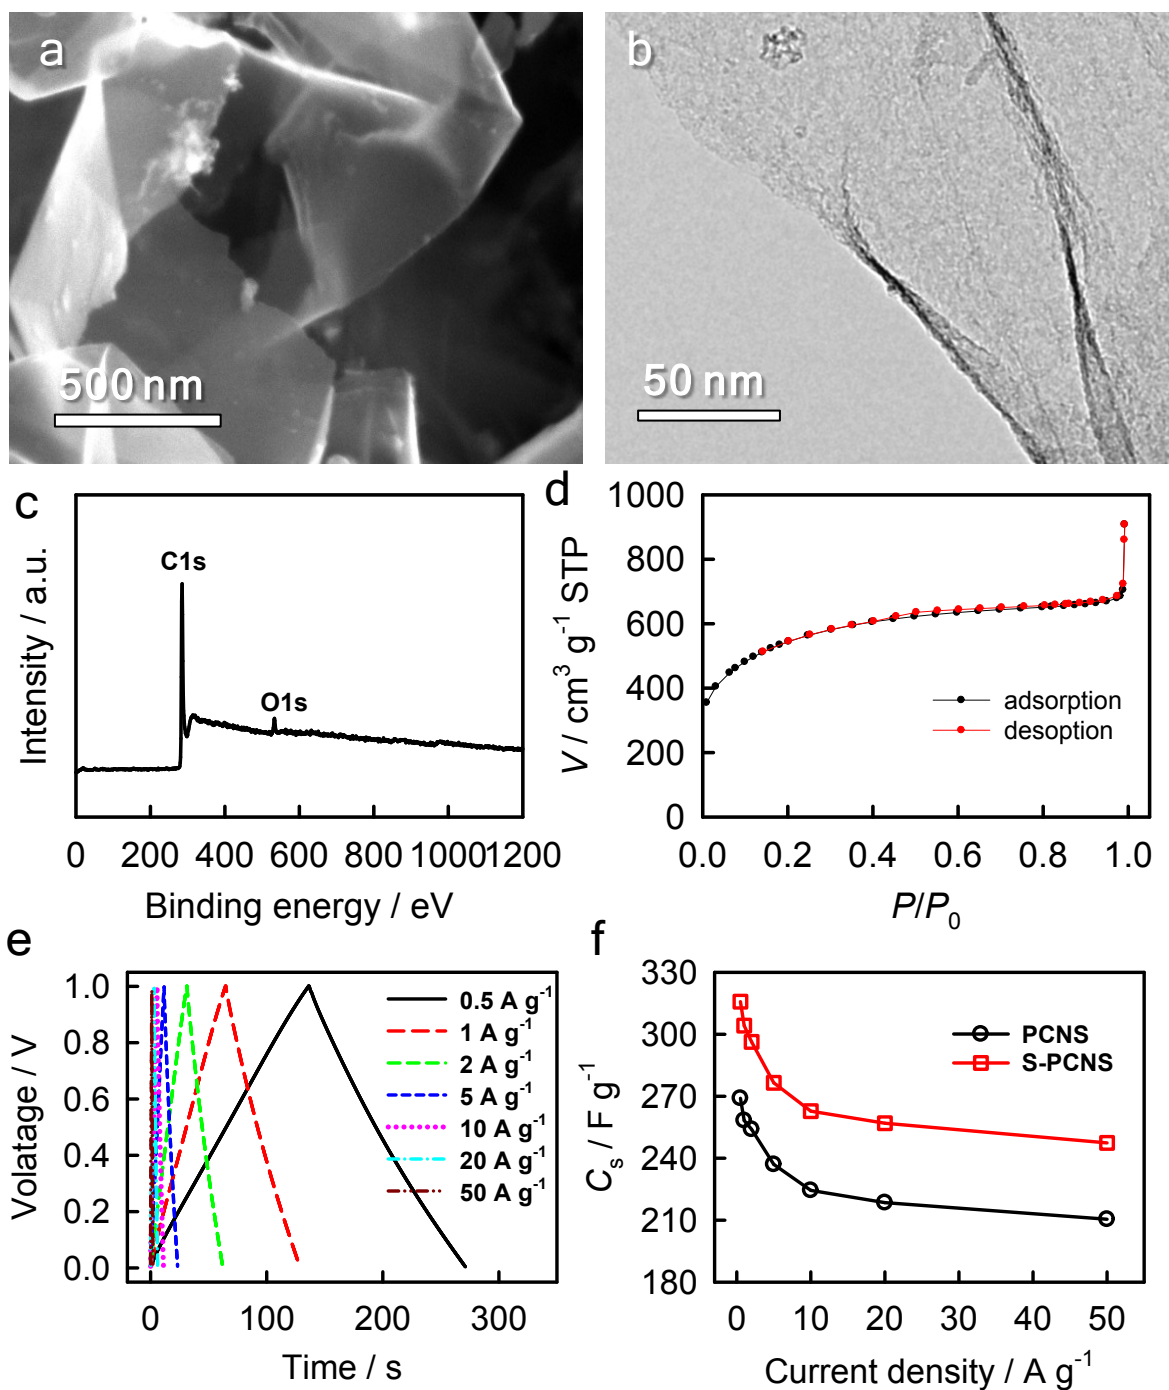

**Fig. S6** SEM image (a), TEM image (b), XPS spectrum (c), Nitrogen adsorption/desorption isotherms (d), galvanostatic charge-discharge curves (e), and specific capacitance (f) of PCNS.

## Reference

- [S1] W. Si, J. Zhou, S. Zhang, S. Li, W. Xing and S. Zhuo, *Electrochim. Acta*, 2013, **107**, 397-405.
- [S2] W. Gu, M. Sevilla, A. Magasinski, A. B. Fuertes and G. Yushin, *Energy Environ. Sci.*, 2013, **6**, 2465-2476.
- [S3] M. Seredych and T. J. Bandosz, *J. Mater. Chem. A*, 2013, **1**, 11717-11727.
- [S4] D. Zhang, Y. Hao, L. Zheng, Y. Ma, H. Feng and H. Luo, *J. Mater. Chem. A*, 2013, **1**, 7584-7591.
- [S5] M. Seredych, K. Singh and T. J. Bandosz, *Electroanalysis*, 2014, **26**, 109-120.
- [S6] X. Zhao, Q. Zhang, C.-M. Chen, B. Zhang, S. Reiche, A. Wang, T. Zhang, R. Schlögl and D. S. Su, *Nano Energy*, 2012, **1**, 624-630.
- [S7] Z. S. Wu, D. W. Wang, W. Ren, J. Zhao, G. Zhou, F. Li and H. M. Cheng, *Adv. Funct. Mater.*, 2010, **20**, 3595-3602.
- [S8] B. You, L. Wang, L. Yao and J. Yang, *Chem. Commun.*, 2013, **49**, 5016-5018.
- [S9] W. Wang, S. Guo, M. Penchev, I. Ruiz, K. N. Bozhilov, D. Yan, M. Ozkan and C. S. Ozkan, *Nano Energy*, 2013, **2**, 94-303.
- [S10] Y. Wang, Y. Wu, Y. Huang, F. Zhang, X. Yang, Y. Ma and Y. Chen, *J. Phys. Chem. C*, 2011, **115**, 23192-23197.
- [S11] Y. Xu, Z. Lin, X. Huang, Y. Liu, Y. Huang and X. Duan, *ACS Nano*, 2013, **7**, 4042-4049.
- [S12] H. Huang, L. Xu, Y. Tang, S. Tang and Y. Du, *Nanoscale*, 2014, **6**, 2426-2433.
- [S13] J.-S. Lee, S.-I. Kim, J.-C. Yoon and J.-H. Jang, *ACS nano*, 2013, **7**, 6047-6055.
- [S14] Y. Li, Z. Li and P. K. Shen, *Adv. Mater.*, 2013, **25**, 2474-2480.
